# Supplementary material
Source: PubMed Central journal article supplement (PMC4151726)
Supplement: 1319488111_pnas.201319488SI.pdf [file 1319488111_pnas.201319488SI.pdf]

# Supporting Information

Hart et al. 10.1073/pnas.1319488111

## SI Materials and Methods

**Treatment of Human Cells K-562, MOLT-4, HL-60, and SW-480 and Quail Cells with KJ-Pyr-9.** For testing adherent cell types,  $1.5 \times 10^5$  cells were seeded into MP-24 dishes and incubated overnight at 37 °C. The next day, the culture medium was replaced by 200  $\mu$ L of ECB buffer (135 mM NaCl, 5 mM KCl, 10 mM Hepes, pH 7.4, 1 mM  $MgCl_2$ , and 1 mM  $CaCl_2$ ) and the KJ-Pyr-9 compound in 25 or 50  $\mu$ M final concentration (diluted from a stock solution in DMSO). Cells were incubated at 37 °C for 30 min. Then, 800  $\mu$ L cell-culture medium containing the compound was added and the cells were further incubated for 24 h at 37 °C. For cells grown in suspension (K-562, MOLT-4, and HL-60),  $1.5 \times 10^5$  cells were collected by centrifugation at  $150 \times g$  and resuspended in 200  $\mu$ L of ECB buffer containing the compound. After a 30-min incubation at 37 °C, 800  $\mu$ L culture medium containing the compound was added and the cells were incubated as above. Cell micrographs were taken 24 h after treatment with the compound.

**Immunofluorescence Staining of NDRG1.** Tumor tissues were fixed in 4% paraformaldehyde overnight, dehydrated, and embedded in paraffin. All samples were sectioned at 5  $\mu$ m. Processing of the sections for protein localization followed the Cell Signaling Immunofluorescence General Protocol. The primary antibody against NDRG1 was from Cell Signaling (5196). Standard immunohistochemistry procedures for polyclonal primary antibodies were applied using instructions from the Cell Signaling Immunofluorescence General Protocol. NDRG1 and nuclear staining were performed using FITC-conjugated goat anti-rabbit IgG (Sigma; F-0382) as secondary antibody and tissue sections were mounted in ProLong Gold Antifade Reagent with DAPI (Molecular Probes; 8961S). Micrographs were taken at 40 $\times$

magnification (microscope objective) with a Hamamatsu digital CCD camera.

**RNA Sequencing.** P493-6 cells were seeded at an initial density of  $1 \times 10^5$  cells per mL in 4 mL medium in a six-well plate. Cells were grown in the presence of 0.1  $\mu$ g/mL doxycycline, 20  $\mu$ M KJ-Pyr-9, or a combination of both. Cells were grown for 48 h and isolated by centrifugation at  $300 \times g$  for 3 min. Total RNA was prepared using a Maxwell 16 instrument (Promega) with simplyRNA LEV reagents. Life Technologies RiboMinus Kits were used to remove rRNA from total RNA samples. One microgram of total RNA input was used for each sample. RNA sequencing (RNAseq) libraries were prepared from ribodepleted RNA samples using the NEBNext Ultra RNA Library Prep Kit for Illumina, following the manufacturer's protocols. The libraries were sequenced on an Illumina HiSeq 2000 using 100-bp single-ended reads. Raw as well as processed data are available online under Gene Expression Omnibus accession no. GSE58168.

**RNAseq Data Analysis.** RNAseq was performed on P493-6 cells in triplicate with no treatment, 20  $\mu$ M KJ-Pyr-9, or 0.1  $\mu$ g/mL doxycycline. Between 9 and 33 million reads were collected per sample. After filtering at 0.3 counts per million, 12,056 genes could be quantified. The dataset showed a low variance at a biological coefficient of variation of 0.057. Reads were aligned to the HG19/GRCh37 genome using the STAR aligner (1). Reads were counted using htseq (2) using GENCODE v19 gene annotations. Analysis of differential expression was performed using edgeR (3) after filtering the data such that a minimum of three samples had more than 0.3 reads per million. Gene set enrichment analysis was performed using GSEA2 (4) using the MsigDB v4.0 curated gene sets.

1. Dobin A, et al. (2013) STAR: Ultrafast universal RNA-seq aligner. *Bioinformatics* 29(1): 15–21.
2. Anders S, Pyl PT, Huber W (2014) HTSeq—A Python framework to work with high-throughput sequencing data. *bioRxiv*:10.1101/002824.
3. Robinson MD, McCarthy DJ, Smyth GK (2010) edgeR: A Bioconductor package for differential expression analysis of digital gene expression data. *Bioinformatics* 26(1): 139–140.

4. Subramanian A, et al. (2005) Gene set enrichment analysis: A knowledge-based approach for interpreting genome-wide expression profiles. *Proc Natl Acad Sci USA* 102(43):15545–15550.







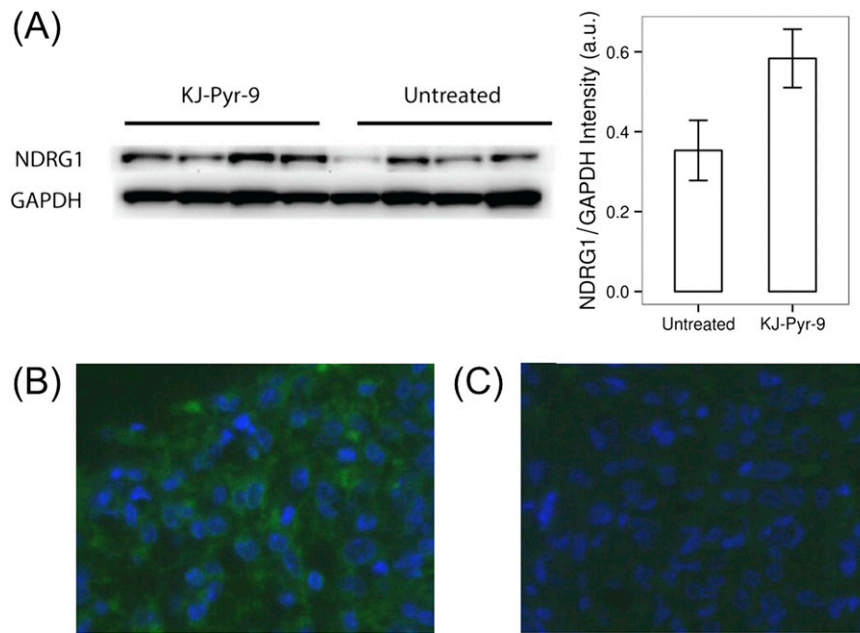

**Fig. 56.** KJ-Pyr-9-treated tumors show increased expression of NDRG1. (A) Higher but variable levels of NDRG1 are detected by Western blot. Quantification of GAPDH-normalized band intensity shows an increase in NDRG1 expression upon KJ-Pyr-9 treatment of xenograft tumors. a.u., arbitrary units. (B and C) Frozen sections of KJ-Pyr-9-treated (B) and untreated (C) tumors stained with an antibody directed against NDRG1. Error bars represent standard error of the mean (SEM).

**Table S1. RNAseq of P493-6 cells: MYC signatures regulated by doxycycline and KJ-Pyr-9 analyzed by gene set enrichment analysis**

| Gene signatures of RNAseq (4)                   | NES   | Nom <i>P</i> value | FDR <i>q</i> value |
|-------------------------------------------------|-------|--------------------|--------------------|
| MYC signatures regulated by KJ-Pyr-9            |       |                    |                    |
| ODONNELL_TARGETS_OF_MYC_AND_TFRC_DN             | -2.24 | 0                  | 0                  |
| SCHUHMACHER_MYC_TARGETS_UP                      | -2.19 | 0                  | 0                  |
| MENSSEN_MYC_TARGETS                             | -1.96 | 0                  | 0.005              |
| YU_MYC_TARGETS_UP                               | -1.82 | 0                  | 0.016              |
| SCHLOSSER_MYC_AND_SERUM_RESPONSE_SYNERGY        | -1.68 | 0.009              | 0.041              |
| BILD_MYC_ONCOGENIC_SIGNATURE                    | -1.64 | 0                  | 0.051              |
| SCHLOSSER_MYC_TARGETS_AND_SERUM_RESPONSE_UP     | -1.61 | 0.011              | 0.066              |
| KIM_MYC_AMPLIFICATION_TARGETS_UP                | -1.54 | 0                  | 0.092              |
| DANG_REGULATED_BY_MYC_UP                        | -1.52 | 0.015              | 0.101              |
| MYC signatures regulated by doxycycline         |       |                    |                    |
| SCHUHMACHER_MYC_TARGETS_UP                      | -3.75 | 0                  | 0                  |
| SCHLOSSER_MYC_TARGETS_REPRESSED_BY_SERUM        | -3.37 | 0                  | 0                  |
| SCHLOSSER_MYC_TARGETS_AND_SERUM_RESPONSE_DN     | -3.18 | 0                  | 0                  |
| DANG_MYC_TARGETS_UP                             | -3.16 | 0                  | 0                  |
| SCHLOSSER_MYC_TARGETS_AND_SERUM_RESPONSE_UP     | -3.02 | 0                  | 0                  |
| KIM_MYC_AMPLIFICATION_TARGETS_UP                | -2.99 | 0                  | 0                  |
| COLLER_MYC_TARGETS_UP                           | -2.94 | 0                  | 0                  |
| MENSSEN_MYC_TARGETS                             | -2.94 | 0                  | 0                  |
| ODONNELL_TARGETS_OF_MYC_AND_TFRC_DN             | -2.93 | 0                  | 0                  |
| DANG_REGULATED_BY_MYC_UP                        | -2.81 | 0                  | 0                  |
| BILD_MYC_ONCOGENIC_SIGNATURE                    | -2.73 | 0                  | 0                  |
| ACOSTA_PROLIFERATION_INDEPENDENT_MYC_TARGETS_UP | -2.68 | 0                  | 0                  |
| YU_MYC_TARGETS_UP                               | -2.61 | 0                  | 0                  |
| SCHLOSSER_MYC_AND_SERUM_RESPONSE_SYNERGY        | -2.45 | 0                  | 0                  |
| BENPORATH_MYC_TARGETS_WITH_EBOX                 | -2.12 | 0                  | 0                  |
| ALFANO_MYC_TARGETS                              | -2.07 | 0                  | 0                  |
| FERNANDEZ_BOUND_BY_MYC                          | -1.89 | 0                  | 0.003              |
| SCHLOSSER_SERUM_RESPONSE_AUGMENTED_BY_MYC       | -1.8  | 0                  | 0.006              |

FDR, false discovery rate; NES, normalized enrichment score; Nom, nominal.
